# Supplementary material for: P2X4 receptors induced in spinal microglia gate tactile allodynia after nerve injury
Source: Springer Nature journal article supplement (doi:10.1038/nature01786), 2003-08-01
Supplement: 41586_2003_BFnature01786_MOESM2_ESM.pdf [file 41586_2003_BFnature01786_MOESM2_ESM.pdf]

## **Supplementary Information**

**Supplementary Information 1. Functional P2X<sub>4</sub>R is expressed in hyperactive microglia in primary culture.** In order to determine whether P2X<sub>4</sub>Rs are functional in microglia with the hyperactive phenotype, we studied microglia in primary culture (Nakajima, K. et al. Identification of elastase as a secretory protease from cultured rat microglia. *J Neurochem* **58**, 1401-1408, 1992) where all of the cells express high levels of OX42 (Supplementary Figure a). We tested for expression of mRNA encoding P2XRs by using reverse transcriptase-polymerase chain reaction (RT-PCR) with primer pairs specific for each of the 7 subtypes of P2XR (P2X<sub>1</sub>R-P2X<sub>7</sub>R). RT-PCR reaction product was detected for P2X<sub>4</sub>R as well as for P2X<sub>7</sub>R, a P2XR subtype previously reported to be expressed in microglia (Ferrari, D. et al. Mouse microglial cells express a plasma membrane pore gated by extracellular ATP. *J Immunol* **156**, 1531-1539, 1996), whereas no RT-PCR product was detected for the other P2XR subtypes. To determine whether P2X<sub>4</sub>R protein was expressed, we used immunocytochemistry and observed intense immunofluorescence for P2X<sub>4</sub>R (Supplementary Figure b). Thus, microglia in culture express both mRNA and protein for P2X<sub>4</sub>R. As P2X<sub>4</sub>Rs are reported to be highly permeable to Ca<sup>2+</sup> (Khakh, B. S. et al. International union of pharmacology. XXIV. Current status of the nomenclature and properties of P2X receptors and their subunits. *Pharmacol Rev* **53**, 107-118, 2001), we investigated whether the P2X<sub>4</sub>Rs on these microglia were functional by applying the agonist ATP and monitoring the level of intracellular Ca<sup>2+</sup> ([Ca<sup>2+</sup>]<sub>i</sub>) in individual cells using the Ca<sup>2+</sup>-sensitive fluorescent dye fura-2. We found that ATP (50 μM, 10 s) produced a transient increase in the 340/360 emission ratio for fura-2 (n=28 cells), indicating that ATP caused an increase [Ca<sup>2+</sup>]<sub>i</sub> in the microglia (Supplementary Figure c). When the extracellular solution had no added Ca<sup>2+</sup> the increase in 340/360 emission ratio evoked by ATP was greatly blunted (n=28 cells, P<0.001). The ATP-evoked increase in 340/360 ratio was suppressed by

TNP-ATP (n=14 cells,  $P<0.01$ ) but was unaffected by PPADS (n=26 cells, Supplementary Figure d). In addition, the effect of ATP (50  $\mu$ M) was not altered by brilliant blue G (BBG, 100 nM, n=21 cells), which is known to differentially block P2X<sub>7</sub>R but not other subtypes of P2XR (Jiang, L. H., Mackenzie, A. B., North, R. A. & Surprenant, A. Brilliant blue G selectively blocks ATP-gated rat P2X<sub>7</sub> receptors. *Mol Pharmacol* **58**, 82-88, 2000). Together, these results indicate that microglia in primary culture, which like hyperactive microglia *in situ* show high levels of OX42, express functional P2X<sub>4</sub>Rs.

**Supplementary Information 2. ATP levels in the cerebrospinal fluid (CSF) from the lumbar spinal cord is not changed following nerve injury.** The ATP levels in the CSF collected from the lumbar spinal cord were measured by a luciferin-luciferase bioluminescence assay. We found that the level of ATP in CSF was not different in nerve-injured rats ( $54.3 \pm 14.8$  nM, n=4 animals) as compared with naïve controls ( $58.1 \pm 12.4$  nM, n=4 animals). Inasmuch as the lack of change in the CSF ATP level indicates that extracellular ATP levels at sites of action at P2X<sub>4</sub>Rs on microglia within the dorsal horn are unchanged after nerve injury, we may infer that tactile allodynia following nerve injury depends upon the enhanced expression of P2X<sub>4</sub>Rs which are then activated by the constitutive level of the endogenous ligand ATP.
